# Supplementary material for: Boosting the Initial Coulomb Efficiency of Sisal Fiber-Derived Carbon Anode for Sodium Ion Batteries by Microstructure Controlling
Source: MDPI journal article supplement (doi:10.3390/nano13050881), 2023-02-26
Supplement: s1 [file s1]

## Supporting Materials

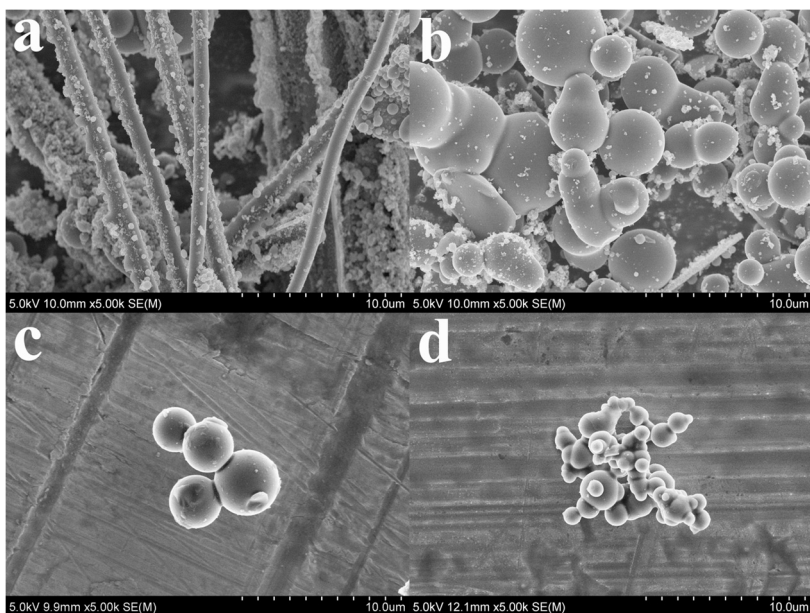

**Figure S1.** SEM images of (a) GSFC-0.1, (b) GSFC-1, (c) GSFC, and (d) GSFC-4.

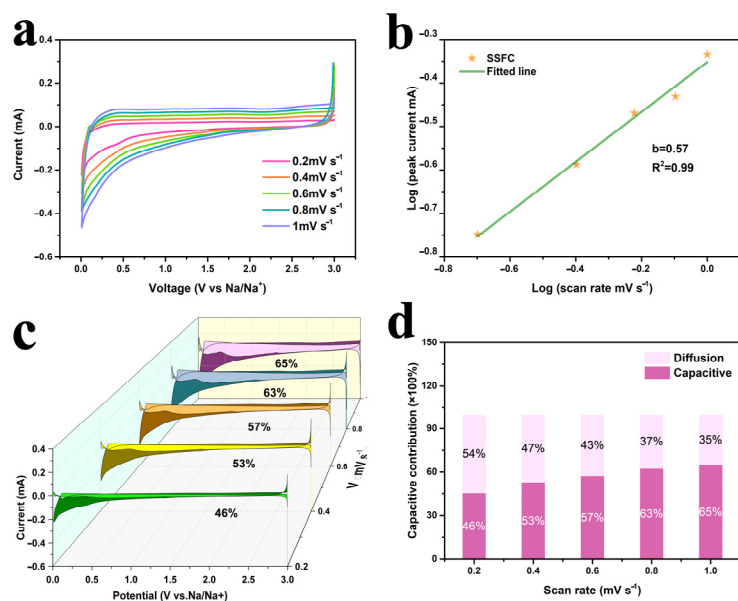

**Figure S2.** (a) Voltammetry curves of SSFC at different scan rates between 0.2 and 1 mV s<sup>-1</sup>; (b) the plots of  $\log(i)$  versus  $\log(v)$  of SSFC; (c) pseudocapacitive contribution waterfall diagram of SSFC; (d) pseudocapacitive contribution of SSFC at different scan rates between 0.2 and 1 mV s<sup>-1</sup>.

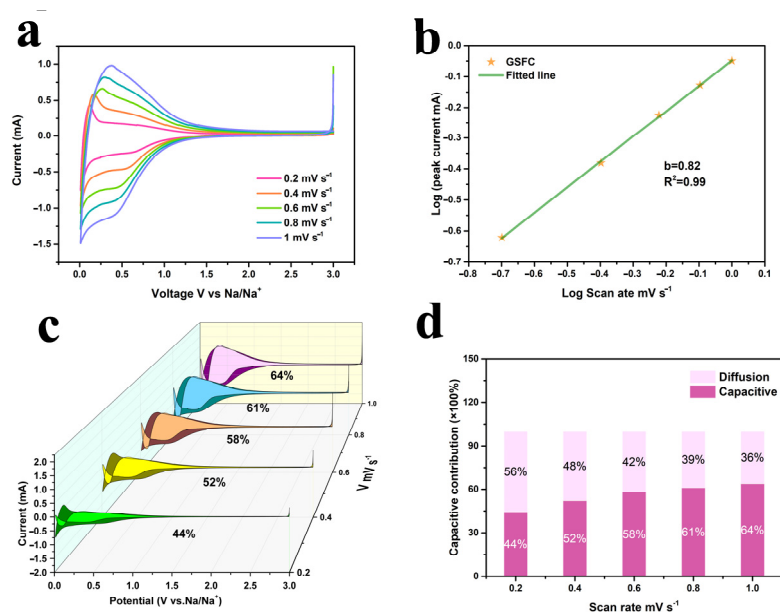

**Figure S3.** (a) Voltammetry curves of GSFC at different scan rates between 0.2 and 1 mV s<sup>-1</sup>; (b) the plots of log(*i*) versus log(*v*) of GSFC; (c) pseudocapacitive contribution waterfall diagram of GSFC; (d) pseudocapacitive contribution of GSFC at different scan rates between 0.2 and 1 mV s<sup>-1</sup>.

**Table S1.** N<sub>2</sub> adsorption/desorption isotherms parameters for the samples.

| Samples | SBET (m <sup>2</sup> g <sup>-1</sup> ) | V <sub>t</sub> (cm <sup>3</sup> g <sup>-1</sup> ) | $\bar{d}$ (nm) |
|---------|----------------------------------------|---------------------------------------------------|----------------|
| TSFC    | 426.02                                 | 0.049                                             | 2.79           |
| SSFC    | 1640.46                                | 0.817                                             | 2.73           |
| GSFC    | 365.24                                 | 0.061                                             | 2.77           |

**Table S2.** The comparison of the electrochemical performance (Coulomb efficiency) of TSFC with other biomass hard carbons for SIB.

| Biomass Precursors    | Microstructure  | Current Density (mA g <sup>-1</sup> ) | Initial Coulombic Efficiency (%) | Ref.      |
|-----------------------|-----------------|---------------------------------------|----------------------------------|-----------|
| Sugarcane             | Sheet porous    | 50                                    | 63                               | [48]      |
| Tamarind              | Bulk            | 50                                    | 70.4                             | [49]      |
| Natural parasol fluff | Tubular         | 50                                    | 49.7                             | [50]      |
| Spartina alterniflora | Bulk porous     | 50                                    | 67                               | [51]      |
| Tangerine peel        | Bulk porous     | 50                                    | 14                               | [52]      |
| Camellia seed         | Uneven granular | 50                                    | 71.6                             | [53]      |
| Sisal fiber           | Hollow tube     | 50                                    | 76.7                             | This Work |
